# Supplementary material for: Effect of Phenolics from Aeonium arboreum on Alpha Glucosidase, Pancreatic Lipase, and Oxidative Stress; a Bio-Guided Approach
Source: MDPI journal article supplement (doi:10.3390/pharmaceutics15112541), 2023-10-27
Supplement: s1 [file s1]

# Effect of Phenolics from *Aeonium arboreum* on Alpha Glucosidase, Pancreatic Lipase, and Oxidative Stress; a Bio-Guided Approach

Marwah M. Alfeqy <sup>1,\*</sup>, Seham S. El-Hawary <sup>2</sup>, Ali M. El-Halawany <sup>2</sup>, Mohamed A. Rabeh <sup>3</sup>, Saad A. Alshehri <sup>3</sup>, Aya M. Serry <sup>4</sup>, Heba A. Fahmy <sup>1,†</sup> and Marwa. I. Ezzat <sup>2,\*†</sup>

<sup>1</sup> Pharmacognosy Department, Faculty of Pharmacy, Modern University for Technology & Information, Cairo 11571, Egypt; heba.fahmy@pharm.mti.edu.eg

<sup>2</sup> Pharmacognosy Department, Faculty of Pharmacy, Cairo University, Kasr El Aini, Cairo 11562, Egypt; seham.elhawary@pharma.cu.edu.eg (S.S.E.-H.); ali.elhalawany@pharma.cu.edu.eg (A.M.E.-H.)

<sup>3</sup> Pharmacognosy Department, College of Pharmacy, King Khalid University, Abha 62251, Saudi Arabia; mrabeh@kku.edu.sa (M.A.R.); salshhri@kku.edu.sa (S.A.A.)

<sup>4</sup> Pharmaceutical Chemistry Department, Faculty of Pharmacy, Modern University for Technology & Information, Cairo 11571, Egypt; ayaserry@hotmail.com

\* Correspondence: drmarwahalfeqy@gmail.com (M.M.A.); marwa.ezzat@pharma.cu.edu.eg (M.I.E.)

† These authors contributed equally to this work.

## Supplementary data

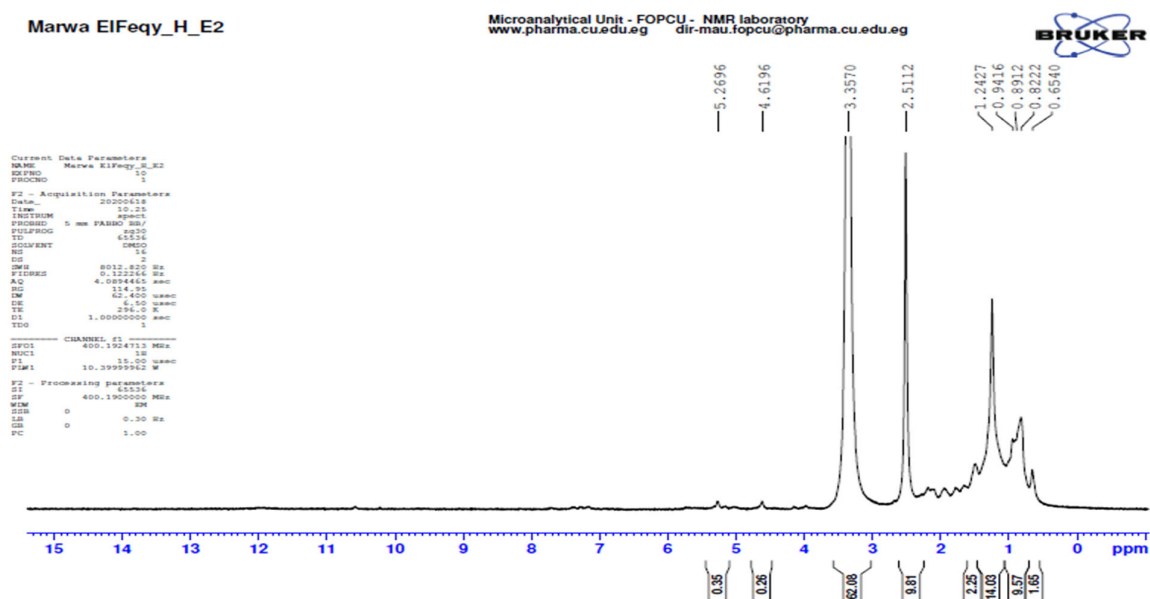

Figure S1. <sup>1</sup>H NMR Chart of  $\beta$ -sitosterol (DMSO, 400 MHz).

Marwah AlFeqy\_H\_S1

Microanalytical Unit - FOPCU - NMR laboratory  
www.pharma.cu.edu.eg dir-mau.fopcu@pharma.cu.edu.eg

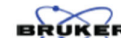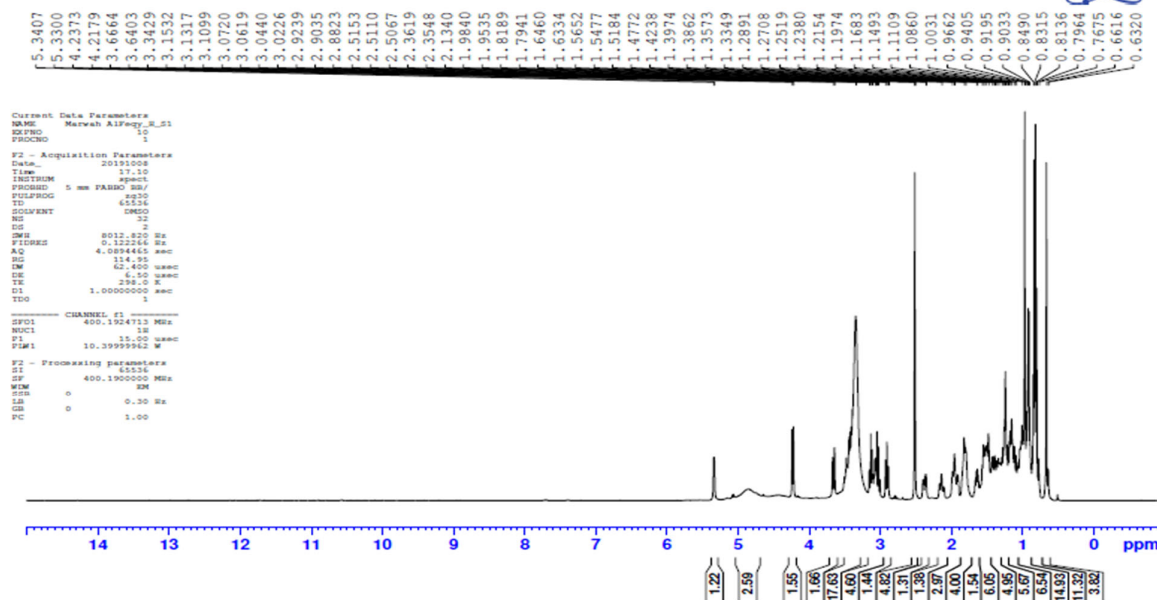

Figure S2. <sup>1</sup>H NMR Chart of  $\beta$ -sitosterol glucoside (DMSO, 400 MHz).

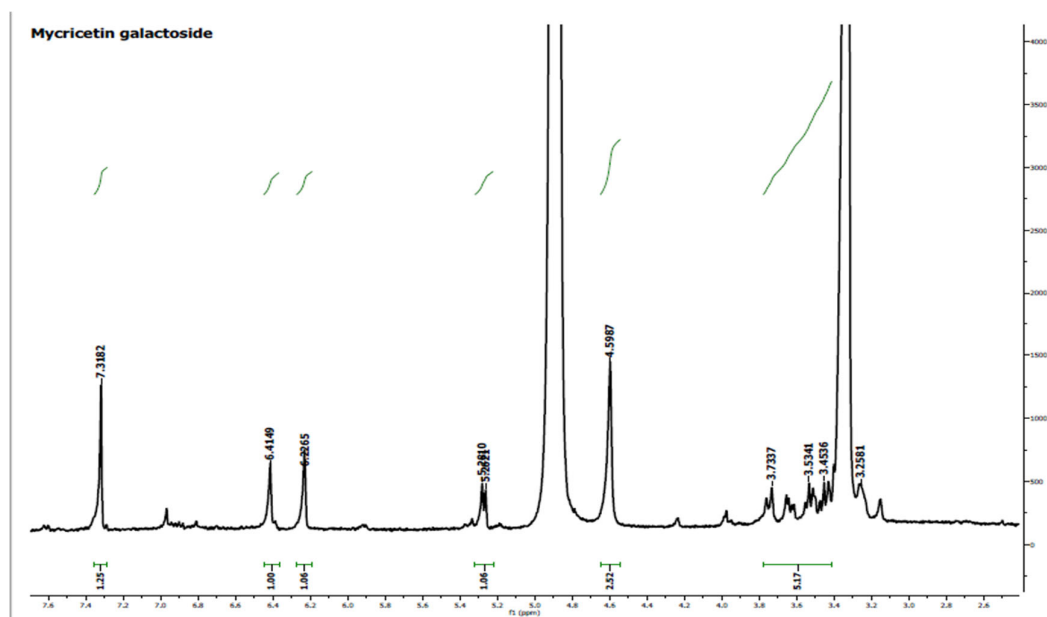

Figure S3. <sup>1</sup>H NMR Chart of myricetin galactoside (MeOD, 400 MHz).

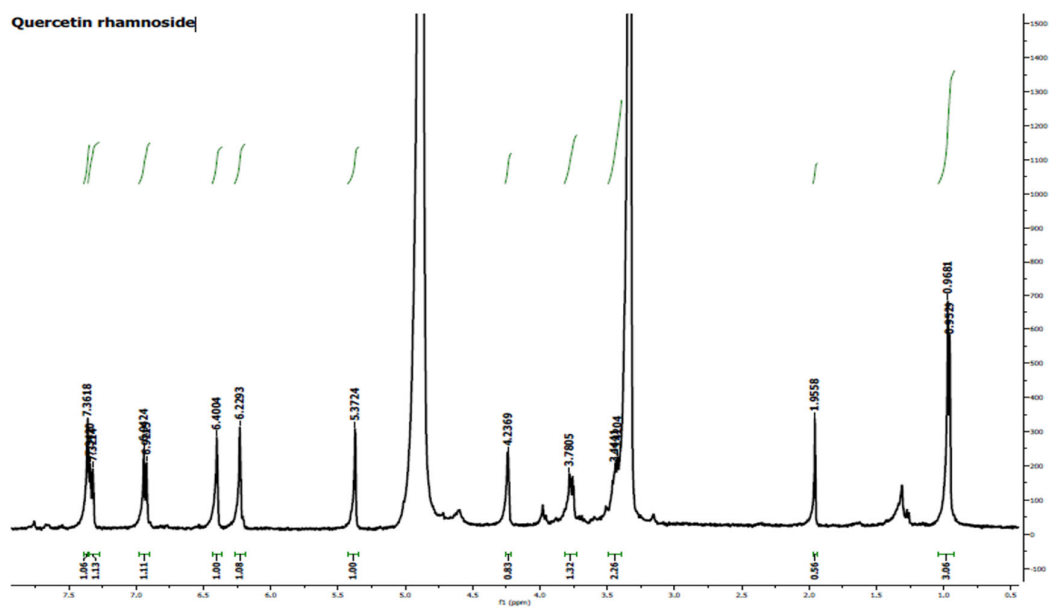

Figure S4.  $^1\text{H}$  NMR Chart of quercetin rhamnoside ( MeOD, 400 MHz).

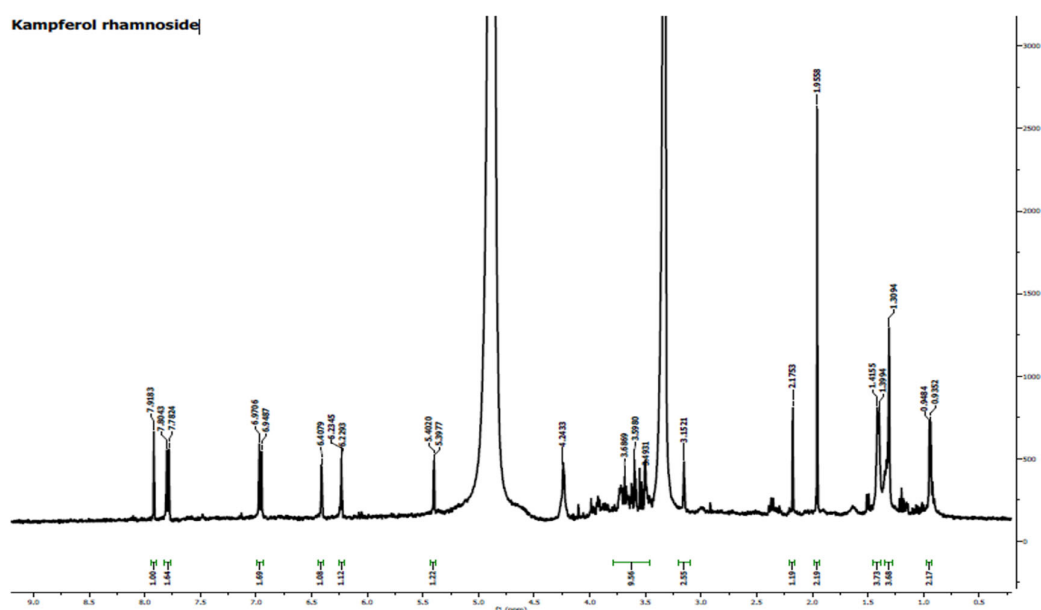

Figure S5.  $^1\text{H}$  NMR Chart of kampferol rhamnoside ( MeOD, 400 MHz).



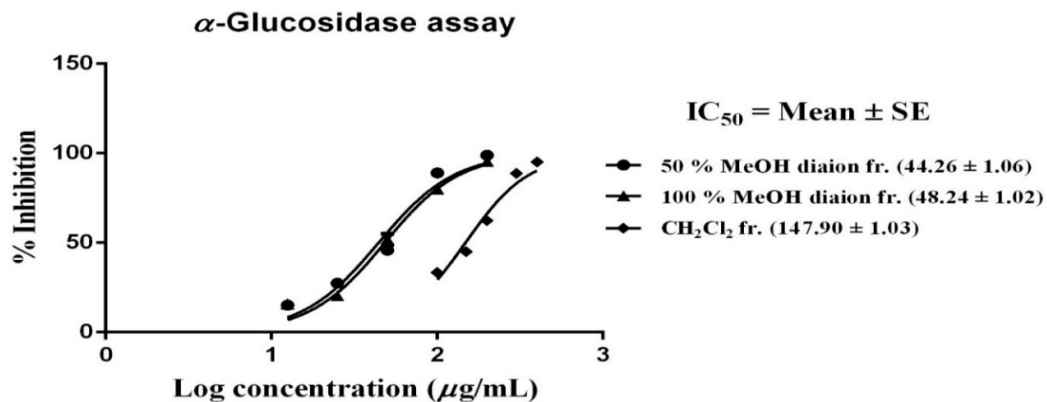

Figure S8. a) Inhibitory effect of *A. arboreum* fractions on  $\alpha$ -glucosidase.

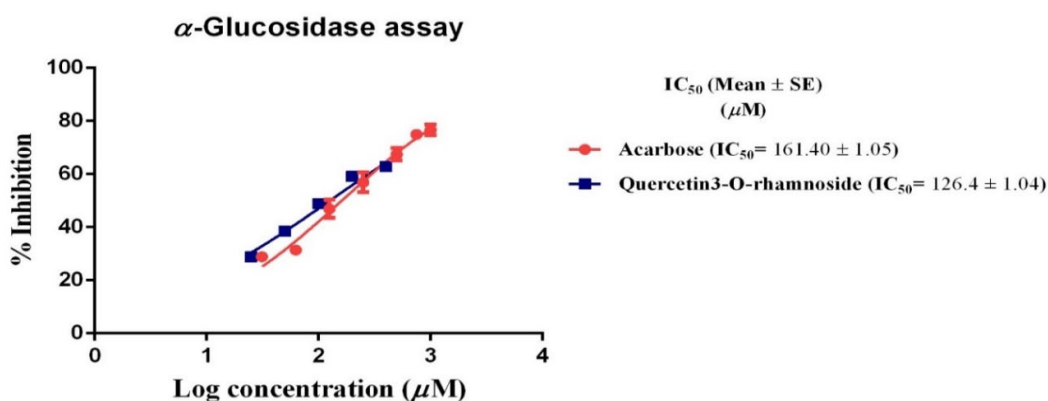

Figure S8. b) Inhibitory effect of quercetin rhamnoside isolated from *A. arboreum* on  $\alpha$ -glucosidase in comparison with acarbose.

Table S2. Pancreatic lipase inhibitory effect of *A. arboreum* fractions and orlistat.

| Sample                     | % inhibition (Mean $\pm$ SD)<br>(500 $\mu$ g/mL or $\mu$ M ) | IC <sub>50</sub> ( $\mu$ M)<br>(Mean $\pm$ SE) |
|----------------------------|--------------------------------------------------------------|------------------------------------------------|
| MeOH extract               | NO                                                           | More than 500 $\mu$ g/mL                       |
| DCM fraction               | 23.05 $\pm$ 1.05                                             | More than 500 $\mu$ g/mL                       |
| 100 % MeOH diaion fraction | 9.43 $\pm$ 0.32                                              | More than 500 $\mu$ g/mL                       |
| 50 % MeOH diaion fraction  | 4.88 $\pm$ 0.55                                              | More than 500 $\mu$ g/mL                       |
| (Quercetin-3-rhamnoside)   | 19.06 $\pm$ 0.34                                             | More than 500 $\mu$ M                          |
| Orlistat                   |                                                              | 0.70 $\pm$ 1.10 $\mu$ M                        |

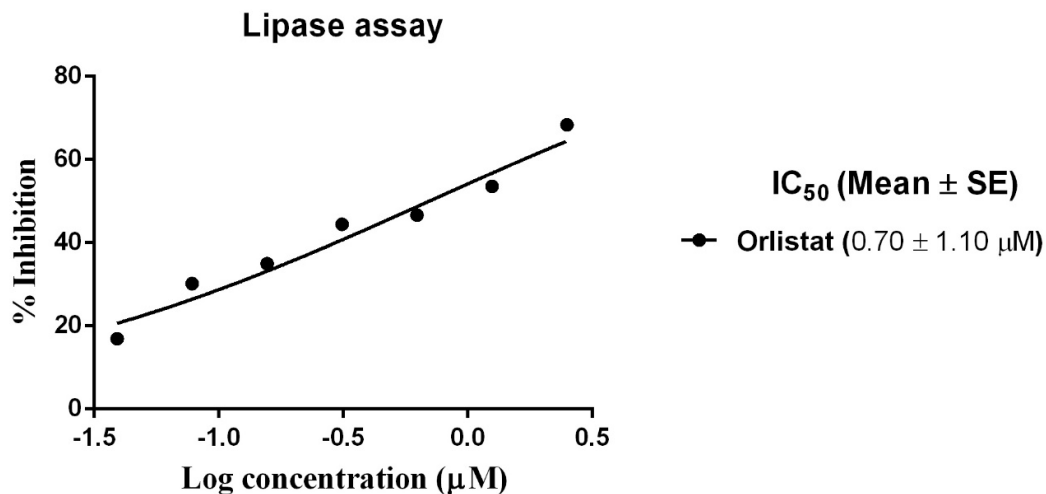

Figure S9. Pancreatic lipase inhibitory effect of orlistat.

Table S3. antioxidant activity of *A. arboreum* fractions using DPPH assay.

| Sample I.D                 | Micro molar Trolox equivalent per mg extract<br>(μM AAE/mg extract) | Standard deviation |
|----------------------------|---------------------------------------------------------------------|--------------------|
| MeOH extract               | 66.13                                                               | 3.45               |
| DCM fraction               | 313.23                                                              | 10.53              |
| 100 % MeOH diaion fraction | 824.06                                                              | 65.68              |
| 50 % MeOH diaion fraction  | 984.71                                                              | 93.28              |
| (Quercetin-3-rhamnoside)   | 576.88                                                              | 33.43              |

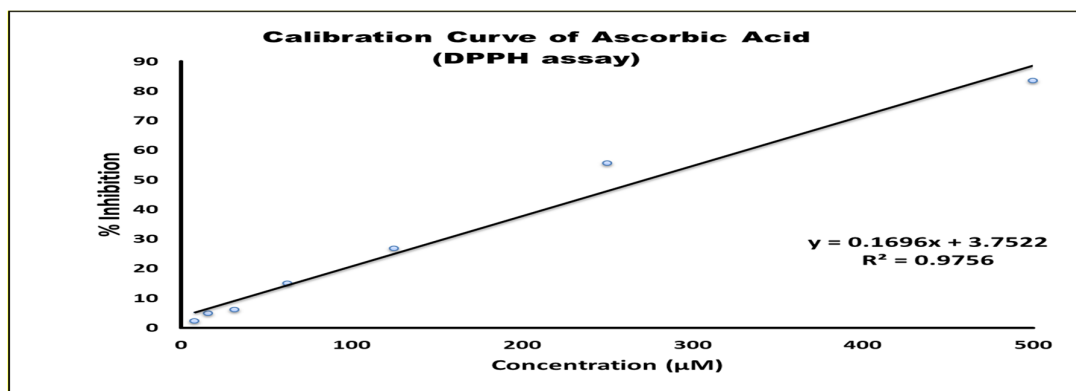

Figure S10. Concentration-response linear curve of ascorbic acid in DPPH assay.

Table S4. antioxidant activity of *A. arboreum* fractions using ABTS assay.

| Sample I.D                 | Micro molar ascorbic acid equivalent per mg<br>extract (μM AAE/mg extract) | Standard deviation |
|----------------------------|----------------------------------------------------------------------------|--------------------|
| MeOH extract               | 141.1490                                                                   | 8.8030             |
| DCM fraction               | 161.8987                                                                   | 6.0702             |
| 100 % MeOH diaion fraction | 1126.8284                                                                  | 87.4056            |
| 50 % MeOH diaion fraction  | 862.3991                                                                   | 104.0465           |
| (Quercetin-3-rhamnoside)   | 1338.0894                                                                  | 81.3854            |

| Concentration (μM) | % inhibition |
|--------------------|--------------|
| 7.8125             | 2.8930       |
| 15.625             | 3.7803       |
| 31.25              | 5.5156       |
| 62.5               | 9.7291       |
| 125                | 16.88018     |
| 250                | 33.5451      |
| 500                | 62.85834     |

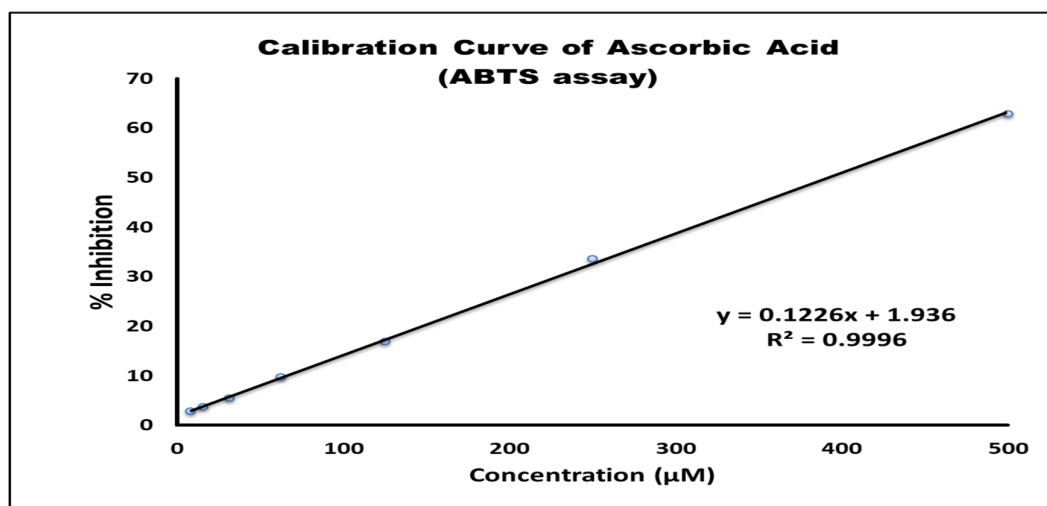

Figure S11. Concentration-response linear curve of ascorbic acid in ABTS assay.

Table S5. antioxidant activity of *A. arboreum* fractions using FRAP assay.

| Sample I.D                 | Micro mole Trolox equivalent per mg sample (μM TE/mg sample) | Standard deviation |
|----------------------------|--------------------------------------------------------------|--------------------|
| MeOH extract               | 233.07                                                       | 11.91              |
| DCM fraction               | 237.18                                                       | 20.19              |
| 100 % MeOH diaion fraction | 669.08                                                       | 33.63              |
| 50 % MeOH diaion fraction  | 574.75                                                       | 51.28              |
| (Quercetin-3-rhamnoside)   | 1681.23 μM TE/mM sample                                      | 49.91              |

| Concentration (μM) | Absorbance |
|--------------------|------------|
| 200                | 0.350      |
| 300                | 0.569      |
| 400                | 0.709      |
| 500                | 0.829      |
| 600                | 0.966      |
| 700                | 1.149      |
| 800                | 1.2687     |
| 900                | 1.432      |
| 1200               | 1.812      |
| 1500               | 2.240      |

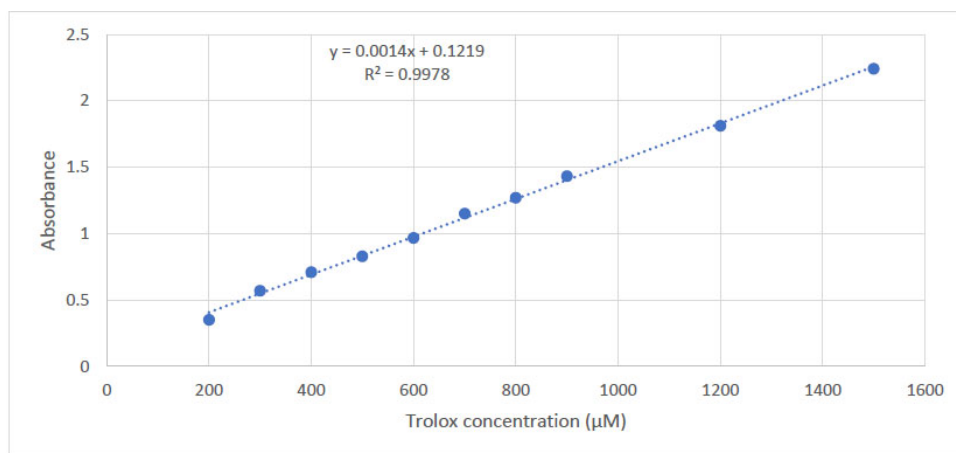

**Figure S12.** Concentration- response linear curve for solutions of Trolox in FRAP assay.

**Table S6.** antioxidant activity of *A. arboreum* fractions using ORAC assay.

| Sample I.D                 | Antioxidant activity using ORAC assay is (μM TE /mg sample) | Standard deviation |
|----------------------------|-------------------------------------------------------------|--------------------|
| MeOH extract               | 9435.29                                                     | 42.78              |
| DCM fraction               | 16373.49                                                    | 312.57             |
| 100 % MeOH diaion fraction | 22140.5                                                     | 1533.05            |
| 50 % MeOH diaion fraction  | 46781.3                                                     | 3169.99            |
| (Quercetin-3-rhamnoside)   | 25258.39 (μMT eq/mM)                                        | 1534.49            |

| Concentration (μM) | RFU      |
|--------------------|----------|
| 50                 | 95512    |
| 100                | 154996   |
| 200                | 210115   |
| 300                | 291670   |
| 400                | 334351.5 |
| 500                | 414683   |
| 600                | 449383.3 |
| 700                | 496138   |
| 800                | 586368.3 |
| 1000               | 738391   |

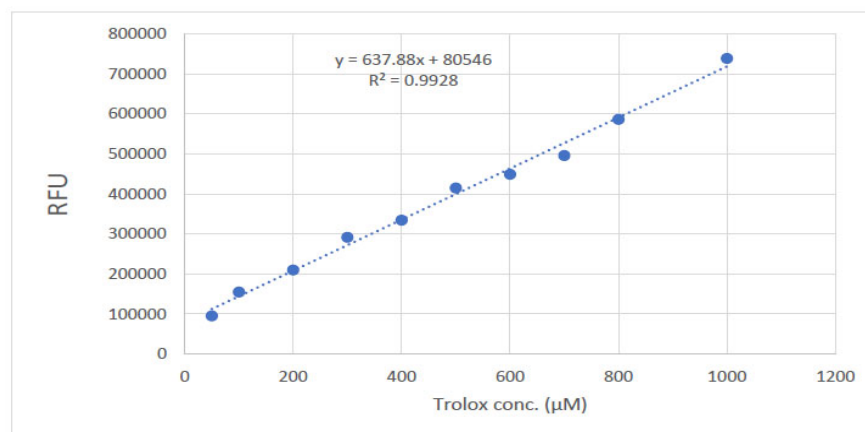

**Figure (S13)** Concentration -response linear curve of trolox in ORAC assay.



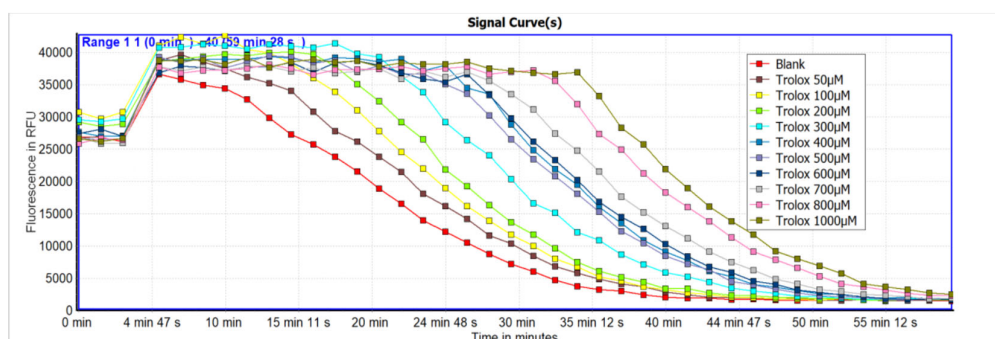

**Figure S14.** Antioxidant effect of Trolox on the decay of fluorescein in ORAC assay. (A) Blank corrected linear regression curve of Trolox. (B) Signal curves of different Trolox concentrations and blank indicating the decay of fluorescein with different concentrations of Trolox.

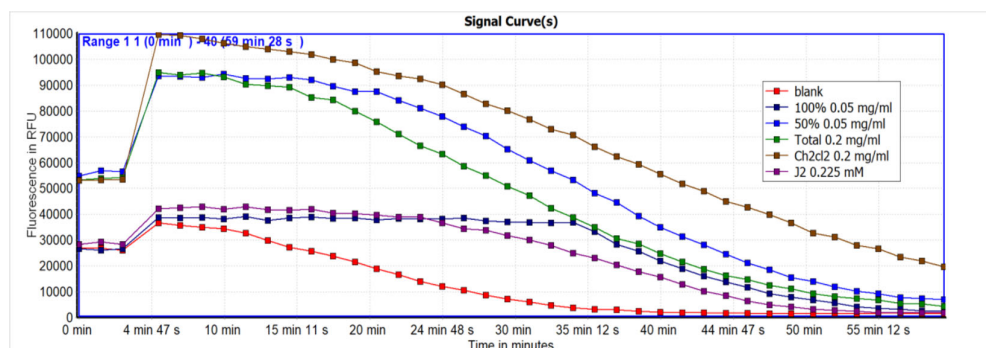

**Figure S15.** Signal curve of Samples and blank indicating the decay of fluorescein upon applying the samples.

**Table S7.** antioxidant activity of *A. arboreum* fractions using metal chelation assay.

| Sample I.D                 | Micro molar EDTA equivalent per mg sample ( $\mu\text{M}$ EDTA eq/ mg sample) | Standard deviation |
|----------------------------|-------------------------------------------------------------------------------|--------------------|
| MeOH extract               | 149.54                                                                        | 11.27              |
| DCM fraction               | 361.94                                                                        | 29.27              |
| 100 % MeOH diaion fraction | 331.12                                                                        | 10.17              |
| 50 % MeOH diaion fraction  | 291.14                                                                        | 8.52               |
| (Quercetin-3-rhamnoside)   | 377.98 $\mu\text{M}$ eq/ mM sample                                            | 26.97              |

| Concentration ( $\mu\text{M}$ ) | % inhibition |
|---------------------------------|--------------|
| 10                              | 7.06         |
| 20                              | 18.87        |
| 30                              | 27.30        |
| 40                              | 38.32        |
| 50                              | 46.68        |
| 60                              | 57.01        |
| 70                              | 62.71        |
| 80                              | 71.93        |

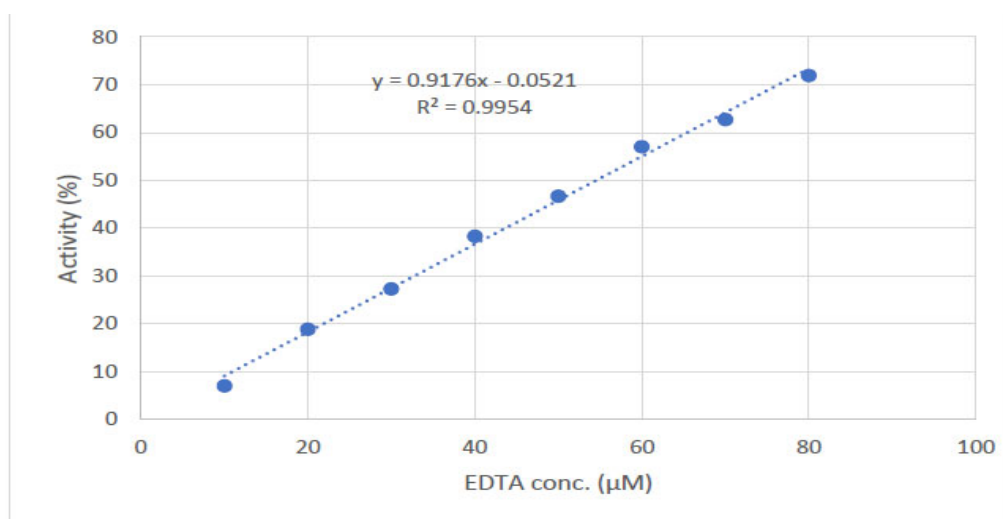

**Figure S16.** Concentration-response linear curve of EDTA in metal chelation assay.
